# Supplementary material
Source: PubMed Central journal article supplement (PMC8825451)
Supplement: kiab490_supplementary_data.pdf [file kiab490_supplementary_data.pdf]

## Supplemental data

**Supplemental Dataset S1:** Supplemental dataset provided at <http://doi.org/10.5281/zenodo.4809980>

This dataset contains:

- the algorithm with graphical user interface for imageJ and its installation procedure ("Cell\_Wall\_Segmentation" and "Cell\_Wall\_SegmentationTutorial")
- a folder comprising a classifier and a dataset compatible with the machine learning part of the algorithm: "data and classifier for weka"
- representative images adapted for testing: "representative images"
- the macro corresponding to the parametric segmentation procedure (see imageJ documentation for installation instructions): "parametric\_segmentation"

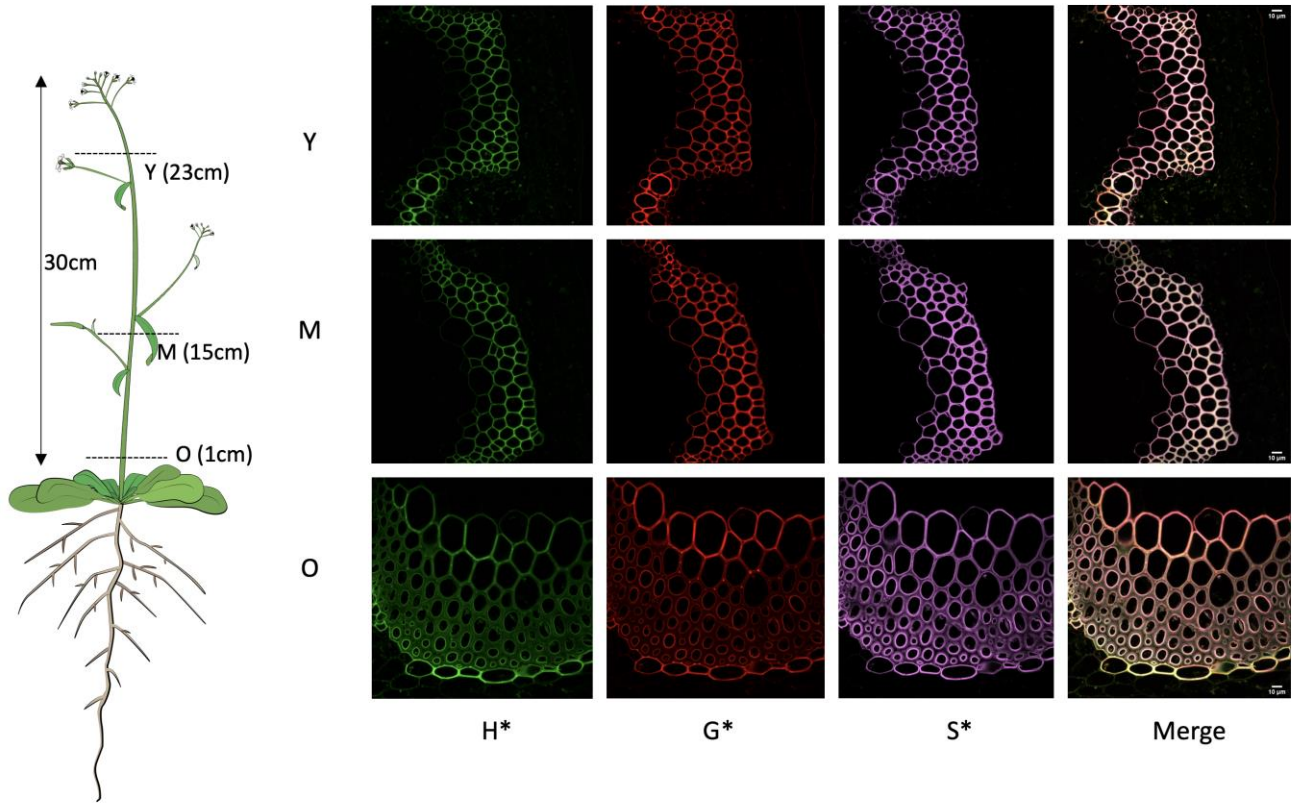

**Supplemental Figure S1:** Bioorthogonal lignin triple labelling of interfascicular fiber cell walls in cross-sections made at different heights (Y - young, M - medium, O - old) of wild-type (WT) *Arabidopsis* floral stems. H\*, G\* and S\* = green/red/magenta CLSM channel images revealing incorporation of the corresponding H\*, G\* and S\* reporters. Merge = merged channels. Scale bar = 10  $\mu$ m.

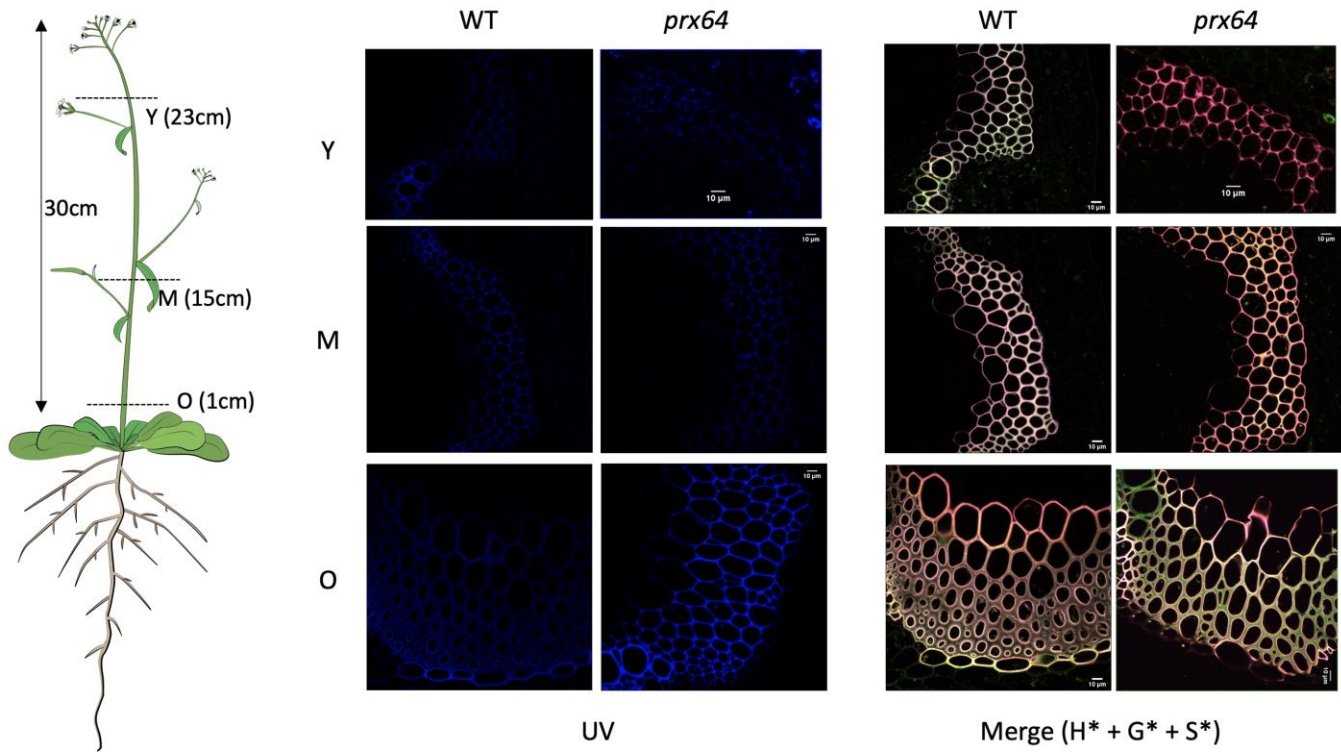

**Supplemental Figure S2:** Bioorthogonal lignin triple (H\*, G\*, S\*) labelling in interfascicular fibers of cross-sections made from different heights in Arabidopsis WT and *prx64* mutant floral stems. Lignin autofluorescence (blue) and merged channels. Y = young, M = medium, O = Old. Scale bar = 10  $\mu$ m.

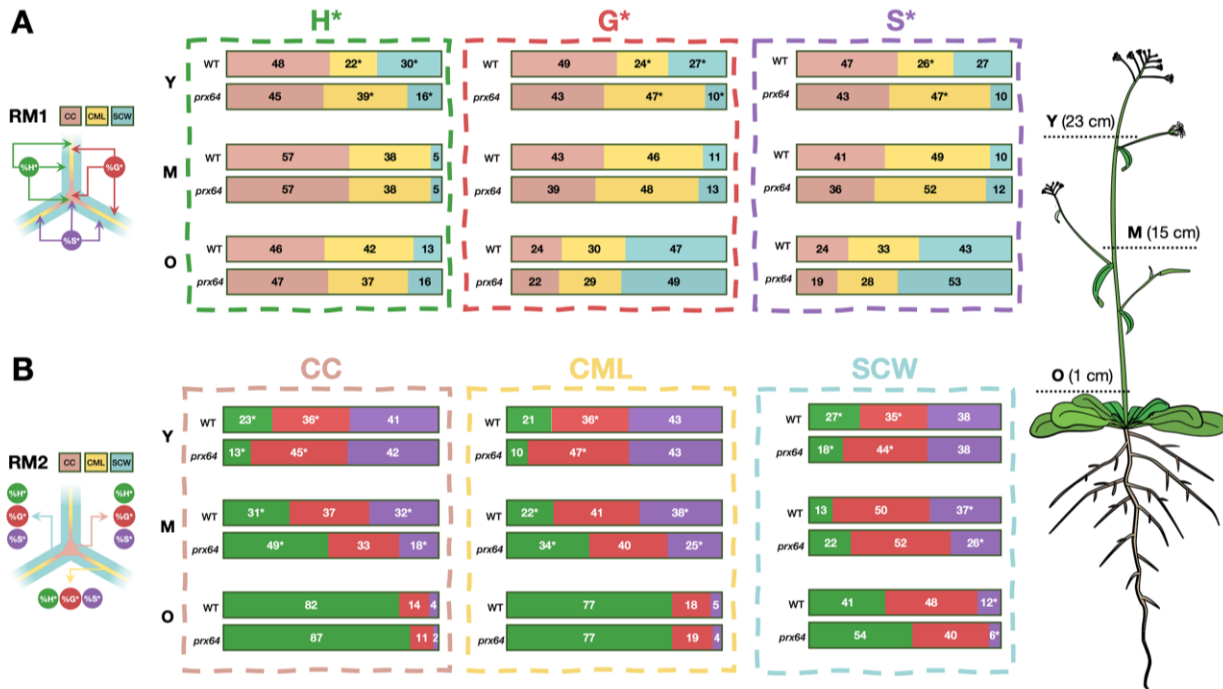

**Supplemental Figure S3.** Comparison of monoglignol reporter incorporation profiles in WT and *prx64* mutant Arabidopsis stem fiber cell walls. **A)** Relative distribution of H\*, G\* and S\* reporters incorporated into different fiber cell wall zones in Y (young), M (medium) and O (old) stem cross sections analyzed by ratiometric method 1 (RM1), CC = cell corner, CML = compound middle lamella, SCW = secondary cell wall; figures represent the percentage of total H\*, G\* and S\* signal incorporated into the different wall zones, Values marked with \* indicate significantly different values (Students T-test, p-value = 0.05) between WT and mutant plants for a given stem height (Y, M, O). **B)** Relative contribution of all reporters to total signal in the cell corner (CC) analyzed by ratiometric method 2 (RM2); figures represent the percentage contribution of each reporter's signal to the total signal intensity in different cell wall zones. Values marked with \* indicate significantly different values (Students T-test, p-value = 0.05) between WT and mutant plants for a given stem height (Y, M, O).

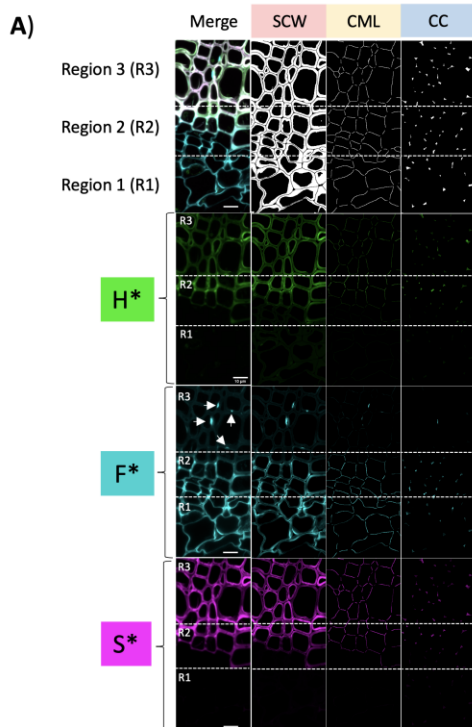

**B)**

| Reporter | CW zone | % Total Intensity |          |          |
|----------|---------|-------------------|----------|----------|
|          |         | Region 1          | Region 2 | Region 3 |
| H*       | CC      | 11 %              | 44 %     | 45 %     |
|          | CML     | 13 %              | 38 %     | 49 %     |
|          | SCW     | 13 %              | 38 %     | 49 %     |
| F*       | CC      | 43 %              | 44 %     | 13 %     |
|          | CML     | 43 %              | 40 %     | 17 %     |
|          | SCW     | 43 %              | 38 %     | 20 %     |
| S*       | CC      | 11 %              | 40 %     | 49 %     |
|          | CML     | 12 %              | 35 %     | 53 %     |
|          | SCW     | 12 %              | 36 %     | 52 %     |

**C)**

| Reporter | CW zone | % Intensity (RM1) |          |          |
|----------|---------|-------------------|----------|----------|
|          |         | Region 1          | Region 2 | Region 3 |
| H*       | CC      | 34 %              | 41 %     | 36 %     |
|          | CML     | 33 %              | 30 %     | 33 %     |
|          | SCW     | 32 %              | 29 %     | 32 %     |
| F*       | CC      | 40 %              | 43 %     | 33 %     |
|          | CML     | 32 %              | 31 %     | 34 %     |
|          | SCW     | 27 %              | 25 %     | 33 %     |
| S*       | CC      | 16 %              | 38 %     | 44 %     |
|          | CML     | 16 %              | 32 %     | 46 %     |
|          | SCW     | 67 %              | 30 %     | 10 %     |

**Supplemental figure S4.** Automatic segmentation of cell wall zones in flax stem tissues showing relative distribution of lignin and non-cellulosic polysaccharide reporters. **A)** The 3 masks (CC, CML, SCW) are applied to three fluorescence channels of CLSM images of flax stem cross-sections incubated with H\* and S\* monolignol reporters and F\* peracetylated alkyne-tagged fucose (Ac<sub>4</sub>FucAlk) reporter according to the triple bioorthogonal strategy. **B)** Table indicating the relative percentage of total signal for reporters in a given cell wall zone found in each of the three different tissue regions (1, 2, 3) analyzed. **C)** Ratiometric analysis 1 (RM1) of the relative amounts of total reporter signal found in the different cell wall zones. H\*, S\* = monolignol reporters; F\* = fucose reporter; CC = cell corner, CML = compound middle lamella, SCW = secondary cell wall, scale bar = 10 μm; red values in tables = highest %, green values in tables = lowest %. Region 1 corresponds to the phloem/vascular cambium, Region 2 corresponds to the vascular cambium/young differentiating xylem, Region 3 corresponds to more mature xylem tissue, arrows indicate xylem pits.
